## **Distinct spatiotemporal mechanisms underlie extra-classical receptive field modulation in macaque V1 microcircuits**

Christopher A. Henry<sup>1-2</sup>, Mehrdad Jazayeri<sup>3</sup>, Robert M. Shapley<sup>1</sup>, Michael J. Hawken<sup>1</sup>

<sup>1</sup> Center for Neural Science, New York University, New York, NY 10003, USA

<sup>2</sup> Dominick Purpura Department of Neuroscience, Albert Einstein College of Medicine, Bronx, NY 10461, USA

<sup>3</sup> Department of Brain and Cognitive Sciences, McGovern Institute for Brain Research, Massachusetts Institute of Technology, Cambridge, MA 02139, USA

### **Corresponding authors:**

Christopher A. Henry  
Email: [christopher.henry@einstein.yu.edu](mailto:christopher.henry@einstein.yu.edu)

Michael J. Hawken  
Email: [michael.hawken@nyu.edu](mailto:michael.hawken@nyu.edu)

## Abstract

Complex scene perception depends upon the interaction between signals from the classical receptive field (CRF) and the extra-classical receptive field (eCRF) in primary visual cortex (V1) neurons. While much is known about V1 eCRF properties, it remains unknown how the underlying mechanisms map onto the cortical microcircuit. We probed the spatio-temporal dynamics of eCRF modulation using a reverse correlation paradigm, and found three principal eCRF mechanisms: tuned-facilitation, untuned-suppression, and tuned-suppression. Each mechanism had a distinct timing and spatial profile. Laminar analysis showed that the timing, orientation-tuning, and strength of eCRF mechanisms had distinct signatures within magnocellular and parvocellular processing streams in the V1 microcircuit. The existence of multiple eCRF mechanisms provides new insights into how V1 responds to spatial context. Modeling revealed that the differences in timing and scale of these mechanisms predicted distinct patterns of net modulation, reconciling many previous disparate physiological and psychophysical findings.

**Keywords:** primary visual cortex, laminar organization, surround suppression, surround facilitation, spatiotemporal dynamics

## Introduction

Object vision relies on integrating and differentiating local image features to form a representation of the visual input. Many low- to mid-level computations emerge in neuronal response properties in primary visual cortex (V1) where neurons have both classical (CRF; Hubel and Wiesel, 1962; 1968; Angelucci et al., 2002) and extra-classical (eCRF; Allman et al., 1985; Levitt and Lund 1997; Angelucci et al., 2002) receptive fields. The CRF provides the spatio-temporal filtering properties of the neuron, and consists of regions where stimuli directly evoke spiking activity. The eCRF modulates CRF spiking responses, providing contextual components that are especially important in complex visual recognition (Meese et al., 2009, Meese and Baker, 2013), and assignment of border-ownership that is crucial to figure-ground perception (Lamme 1995; Kogo and Wagemans, 2013; Russell et al., 2014).

Many issues about the eCRF mechanisms and their computations are unresolved. There is considerable debate to what extent the eCRF produces facilitation or suppression (Angelucci et al., 2017) – and thus whether it involves feature integration or differentiation. Furthermore, it remains unclear whether eCRF modulation arises from a single or multiple mechanisms. Previous studies have also found timing-differences of eCRF modulation (Muller et al. 2003; Smith et al. 2006; Henry et al. 2013); understanding stimulus-dependent signal-timing is fundamental for determining how the eCRF gates CRF responses. Further, the extent to which the eCRF mechanisms are inherited or emerge via computations within the cortical microcircuit is unclear. In addition, there is recent interest in how the magnocellular and parvocellular streams contribute to contextual processing in V1 and extra-striate cortex (Jones et al., 2012; Henry et al., 2013; Conway, 2014; Klauke and Wachtler, 2015). How eCRF properties differ across the laminar architecture in V1 may strongly impact how context information is relayed along distinct cortical output pathways.

In this paper we introduce the study of eCRF contextual modulation in the temporal domain via reverse correlation. This approach enabled separate characterization of multiple functional mechanisms within the eCRF because it turned out that facilitation and suppression exhibited distinct spatial and temporal dependencies. Furthermore, we studied the dynamics of eCRF modulation across cortical layers to assess whether these response dynamics were distributed or elaborated in distinct feedforward and feedback output pathways.

Our new findings provide evidence for multiple dynamic mechanisms in the eCRF (Ringach et al., 2003; Xing et al., 2005) with distinct spatial profiles and orientation tuning: 1) orientation-tuned-facilitation was found within the CRF and near the CRF/eCRF border but was absent at larger spatial extents; 2) orientation-untuned suppression was localized near the CRF/eCRF border; 3) orientation-tuned suppression was found at larger spatial extents than facilitation or untuned suppression. Different eCRF mechanisms were found in different cortical layers and their laminar location was related to parallel processing in magnocellular and parvocellular streams that contribute differentially to the dorsal (Goodale, 2014) and ventral (Kravitz et al., 2013) extra-striate processing streams. Based on our experimental findings, we propose that there are various eCRF mechanisms that are activated by different spatial and temporal stimulus configurations and different feedforward input streams. Understanding when and where these mechanisms operate can reconcile previous conflicting interpretations of eCRF function.

## Results

The time course of eCRF modulation was measured and its dependence upon orientation, spatial phase, and spatial extent determined using a reverse-correlation stimulation paradigm in 106 neurons (Figure 1). The results describe the components of eCRF modulation across the population and how response dynamics varied with neurons' laminar locations. Finally, modeling results demonstrate the net effects that multiple eCRF mechanisms have for specific contextual stimuli.

### Three Components of eCRF Modulation

The CRF stimulus was an achromatic drifting grating of the individual neuron's preferred orientation, spatial and temporal frequency, and drift direction. The CRF grating moved continuously, evoking a steady spike discharge. For each neuron, the CRF stimulus contrast was set to evoke ~50% of the neuron's maximum response, ensuring that the neuron's drive provided sufficient dynamic range to observe both suppression and facilitation via eCRF stimulation. The timing of eCRF influence was probed by briefly presenting additional high contrast achromatic drifting gratings in the eCRF that changed randomly in orientation and direction every two stimulus frames (20 ms). The eCRF stimulus sequence contained occasional stimuli of 0% luminance contrast (mean grey) to provide a reference response with no eCRF stimulation (Figure 1A). Analysis consisted of reverse correlation of action potentials (spikes) with preceding eCRF stimuli. This reverse correlation approach is similar to those studying the generation of CRF selectivity for orientation and spatial frequency (Ringach et al., 1997; Bredfeldt and Ringach, 2002; Xing et al. 2005) and binocular interactions (Tanabe et al., 2011, Tanabe and Cumming, 2014).

For a fixed time lag, modulation caused by a given eCRF stimulus was quantified as the log ratio of the probability that a given eCRF stimulus occurred prior to a spike over the probability that a blank eCRF stimulus occurred.

$$R_{\theta}(\tau) = \log\left(\frac{p(\theta|\tau)}{p(\text{blank}|\tau)}\right)$$

We refer to the function  $R_{\theta}(\tau)$  as the log-odds ratio (LOR), where  $\tau$  is the time preceding a spike and  $\theta$  is the orientation of the eCRF stimulus. Positive values (e.g. Figure 1C at 0, 180 degrees) indicate eCRF stimulus-induced spiking increases (interpreted as response facilitation). Negative values (e.g. Figure 1C at 90, 270 degrees) indicate eCRF stimulus-induced spiking decreases (interpreted as response suppression). Values near zero (Figure 1B) indicate no difference between eCRF stimulus and blank (interpreted as no response modulation). Figure 1 and later figures plot the LOR as a function of orientation and time as a false color map with facilitation shown in red and suppression in blue.

We observed three main response components within the population, as illustrated by three example V1 neurons (Figure 1 D-F). All eCRF orientations are plotted relative to the neuron's CRF orientation preference. Some neurons showed an early tuned facilitation (Figure 1F, red) often followed by a distinct, tuned suppression (Figure 1F, blue). Many neurons showed early response suppression that was equal across all eCRF orientations (Figure 1D: blue band at 50-70 ms). Such untuned suppression often was followed by orientation-tuned-suppression for stimuli collinear with the CRF stimulus (Figure 1D: 75-100 ms). In many neurons, this delayed orientation-tuned suppression was predominant (Figure 1E). The magnitudes of the facilitation and suppression were calculated as the z-scores of the LOR compared to the baseline variance (see **Methods**). Neurons with z-scores  $>2$ , i.e. deviation from the baseline response  $\pm 2$  s.d.,

were deemed to have a significant component of eCRF modulation. In the following section, we examine how magnitude and timing of eCRF modulation varied across our V1 population.

### **Magnitude of eCRF Facilitation and Suppression Across the V1 Population**

Overall, suppressive eCRF components were more prevalent than eCRF facilitation, and also had larger peak modulation-amplitudes. Only 25% of neurons (27/106; Figure 2A) had significant early facilitation from eCRF orientations collinear to the CRF grating. More than half of the population (55%, 58/106; Figure 2B) had significant untuned suppression (estimated from the LOR value at orthogonal-to-preferred eCRF orientations). Significant tuned suppression at collinear orientations was observed in 79% of neurons (84/106; Figure 2C). All three components of eCRF modulation could be commingled in individual neurons' responses. A small number of neurons showed both an early eCRF facilitation followed by either untuned suppression (14/106) or tuned suppression (21/106). For those neurons that had significant components of eCRF modulation, the average peak z-scores were  $4.6 \pm 0.5$  for tuned facilitation,  $6.6 \pm 0.6$  for untuned suppression, and  $6.4 \pm 0.5$  for tuned suppression (mean  $\pm$  s.e.m.), indicating that suppressive mechanisms had greater strength as well as prevalence across our population.

### **Timing of eCRF Facilitation and Suppression**

The precise timing of eCRF components provides key information about underlying mechanisms. We used the time to peak modulation as a metric to compare the dynamics between component eCRF mechanisms. For the 25% of neurons that showed eCRF facilitation, the peak time was  $60 \pm 3$  ms ( $n=27$ , mean  $\pm$  s.e.m.). The average peak time for untuned suppression was similar ( $55 \pm 2$  ms;  $n = 58$ ). When untuned suppression and facilitation were present within the same neurons, the time of peak facilitation was significantly earlier than that of suppression (Figure 2D,  $n=14$ ,  $p<0.005$ ) though for several neurons the times were similar.

The average peak time of tuned suppression ( $76 \pm 3$  ms) was significantly later than that of facilitation (Figure 2E,  $p < 0.0001$ ) and untuned suppression (Figure 2F,  $p < 0.0001$ , all paired tests are Wilcoxon signed-rank tests unless otherwise indicated). We further compared eCRF component dynamics by measuring the length of time over which we observed a significant response. The average duration of the three components were  $16 \pm 2$  ms for facilitation,  $23 \pm 2$  ms for untuned suppression, and  $36 \pm 3$  ms for tuned suppression. Thus tuned suppression, in addition to being the most prevalent eCRF mechanism, also exhibited the most prolonged temporal profile.

### **Spatial Extent of eCRF Mechanisms**

The border between the CRF and eCRF was defined by the closest regions to the CRF where stimulation produced no evoked spiking response when there was no stimulus in the CRF. The results above reflect experiments where the inner extent of the dynamic probe stimulus was placed at the eCRF border. In additional experiments, we varied the position of the dynamic stimulus to probe the spatial extent of underlying component mechanisms of eCRF modulation. Figure 3 illustrates the three spatial configurations employed. Two spatial configurations (Figure 3D, F) were added, to compare to the effects stimuli that began at the eCRF border (Figure 3E). In Figure 3D-F the red circle represents the CRF/eCRF border, the vertical grating indicates the stimulus driving the CRF, and the horizontal grating represents the region in which the eCRF stimulus sequence was shown.

We compared the dynamics of eCRF modulation for the three spatial conditions tested (Figure 3A-C) by averaging across all neurons. Since neurons with strong modulation could bias this measure, we confirmed that results were similar when neurons were weighted equally by normalizing the maps of each neuron before averaging (not shown). In the following sections we



report how the strength of eCRF components varied with spatial configuration, on average and within individual neurons.

**Results at 1 x eCRF** The average eCRF dynamics with the inner diameter of the probe stimulus at the CRF/eCRF border are shown in Figure 3B. There was strong untuned suppression at 40-60 ms with strong tuned suppression appearing at 80-120 ms. While there was response facilitation for some individual neurons (Figure 3G, x-axis), it is not evident in the average response since such facilitation was relatively weak and had temporal overlap with early untuned suppression.

**0.5 x compared to 1 x eCRF** By placing the inner edge of the probe stimulus at 0.5 x the eCRF border (Figure 3D), we could infer how modulation dynamics change by engaging regions closer to the CRF. In this configuration, early facilitation became more prevalent (Figure 3A), with 91% (43/47) of neurons showing significant facilitation (Fig, 3G, y-axis). The magnitude of facilitation was significantly greater in individual neurons than it was at the 1 x eCRF border condition (Figure 3G,  $p < 0.0001$ ). On average, facilitation peaked around 55 ms and was strongly tuned to orientations collinear with neurons' preferred orientation (Figure 3A). The timing was similar to that seen in the 25% of neurons exhibiting facilitation at the eCRF border. This suggests that these facilitative signals were most likely driven by the spatial continuation of central CRF mechanisms.

Untuned and tuned suppression remained present with this closer eCRF configuration and maintained the same response dynamics (Figure 3A). The magnitude of untuned suppression was not significantly different between the 0.5x and 1x border conditions (Figure 3I,  $p = 0.15$ ), indicating that untuned suppression comes mainly from signals evoked by visual stimulation beyond 1 x eCRF.

Tuned suppression showed a significant correlation between the two spatial conditions (Fig 3K, Pearson's correlation,  $r = 0.54$ ,  $p=0.0001$ ), though it was somewhat reduced at 0.5 x eCRF (Figure 3K). This apparent reduction in magnitude likely resulted from the temporal overlap with strong tuned facilitation evoked within the CRF, leading to partial cancellation of overall suppression strength.

**1 x compared with 2 x eCRF** By comparing response dynamics from 1 x eCRF border with those evoked beyond 2 x eCRF border, we could infer what modulation arises from just outside the eCRF border. With the distant stimulus, early facilitation was absent on average (Figure 3C), was observed in only 4/47 individual neurons, and was significantly weaker than at the eCRF border (Figure 3H,  $p<0.02$ ). These results indicate that early facilitation arises from extensions of local CRF mechanisms.

Untuned suppression on average was considerably weaker when evoked by distant stimuli (Figure 3C): it was present in 19/47 neurons and had significantly lower magnitude than from at the eCRF border (Figure 3J,  $p<0.0001$ ). This result implies that a majority of untuned suppression emerged from the annular region between 1-2x the eCRF inner border.

In contrast, tuned suppression remained clearly evoked on average by distant stimuli (Figure 3C). For individual neurons the magnitude of tuned suppression significantly correlated with that measured at the 1 x eCRF border condition (Figure 3L, Pearson's correlation,  $r = 0.63$ ,  $p<0.0001$ ). This suggests that tuned suppression was evoked mainly from regions beyond 2 x eCRF in most V1 neurons.

### **Spatial Phase Dependence of eCRF Mechanisms**

To examine phase dependence, eCRF stimuli were presented at two different phases relative to the grating in the CRF (in-phase or 180 degrees out-of-phase); all analyses thus far ignored, and thus marginalized over, spatial phase differences. We separately determined how eCRF modulation from collinear stimuli depended jointly upon the spatial extent and the relative spatial phase of the surround stimuli. Results are given in Supplementary Figure 1. To summarize, our results suggested that there was no phase-dependence of either component of suppression but there was spatial phase dependence of tuned facilitation, seen only in simple cells, further evidence that the tuned facilitation from the eCRF was activating the edge of a central CRF mechanism.

### **Laminar Organization of eCRF Modulation**

In primate V1 there are distinct laminar differences in response latencies (Maunsell and Gibson, 1992; Nowak et al., 1995) and in the amount of eCRF suppression (Sceniak et al., 2001). For 81 neurons assigned to layers (see **Methods**) we asked how the spatiotemporal dynamics and component mechanisms of eCRF modulation covaried with laminar location.

Orientation-tuned-suppression was evident in both the magnocellular input layer 4C $\alpha$  and the parvocellular input layer 4C $\beta$ . However, the timing was very different, peaking at 60-75 ms in layer 4C $\alpha$  (Figure 4D) and 100 ms in layer 4C $\beta$  (Figure 4C). Early, untuned suppression was evident on average in layer 4C $\alpha$  but was not observed in 4C $\beta$ . Untuned suppression appeared to be a signature of magnocellular-driven cortical layers, as it was pronounced in layers 4C $\alpha$  and 4B (Figure 4D, B).

In layer 2/3 eCRF dynamics predominantly involved a tuned suppression component that peaked around 100 ms (Figure 4A), with little evidence of strong untuned suppression.

The timing of early suppression in layer 6 was similar to that of layer 4C $\alpha$ . Late tuned suppression in layer 5 was similar to that seen in both layers 4C $\alpha$  and 4C $\beta$ . While layer 5 neurons showed delayed orthogonal facilitation (Figure 4E) that had no counterpart in the input layers, a larger sample is needed to confirm whether this reflects the emergence of a separate facilitative mechanism within the V1 circuit.

### **Relation of eCRF Dynamics to Input Pathways**

For each neuron in the supra- and infragranular layers, we measured the similarity in spatiotemporal dynamics of eCRF modulation with those seen on average in the input layers (4C $\alpha$ , 4C $\beta$ ). We quantified this by cross-correlation of each neuron's eCRF orientation-time map with the average map of all neurons in each input layer as a function of time lag (Figure 4G–J). Figure 4G shows the cross correlation between layer 2/3 neurons and layer 4C $\alpha$  or 4C $\beta$  (red and black, respectively). Each trace shows the cross-correlation averaged over all 2/3 neurons (solid line: mean, shading: s.e.m.). Layer 2/3 dynamics correlated well with both input layers because all had tuned suppression peaking around 80-100 ms. However, the untuned suppression evident in the input layers was not present on average in layer 2/3, possibly the reason why the correlation between 2/3 and 4C $\alpha$  was slightly weaker than with 4C $\beta$ . Layer 4B neurons had a strong correlation with layer 4C $\alpha$  dynamics (Figure 4H). Layer 6 neurons showed a similarly strong correlation with layer 4C $\alpha$  (Figure 4J). In contrast, layer 5 neurons showed similar correlations with both layers 4C $\alpha$  and 4C $\beta$  (Figure 4I), similar to the mixed results in layer 2/3.

For layers 2/3 and 5 that match the dynamics of both layers 4C $\alpha$  and 4C $\beta$  equally well there are two hypotheses. Individual neurons may receive mixed input from both streams to their eCRF mechanisms. Alternatively, some neurons in a given layer could be dominated by the 4C $\alpha$  input while others by 4C $\beta$  input. To address these hypotheses, we directly compared the correlation

values with layer 4C $\alpha$  and 4C $\beta$  within individual neurons. This is summarized as the distribution of the difference in correlation values (at zero lag) for each neuron. If individual neurons all received mixed signals from both input streams, then correlation difference would cluster around zero. For layer 2/3 neurons this does not seem to be the case (Figure 4K). There was a broad range of correlation difference values, many negative indicating layer 4C $\beta$  input, others positive indicating a dominant layer 4C $\alpha$  input, and some around zero suggesting potential combined input. This suggests that the eCRF of a layer 2/3 neuron does not receive mixed input from layers 4C $\alpha$  and 4C $\beta$ , but rather receives dominant input from either the M or P pathway. The correlation pattern in layers 4B and 6 was different; there was a clear bias towards positive correlation difference values, confirming that the majority of individual neurons in layers 4B and 6 (Figure 4L, 4N) had dynamics better matched to layer 4C $\alpha$  than 4C $\beta$ . Among the 8 layer 5 neurons recorded, the correlation difference also split between negative and positive values (Figure 4M), suggesting possible stream-specific input onto single neurons.

### **Tuning of Facilitation and Suppression**

Previous studies comparing tuning between the eCRF and CRF (Webb et al., 2005) involved responses integrated over time, and would have engaged multiple distinct eCRF mechanisms. Through isolating separate distinct mechanisms of tuned facilitation and suppression, we can directly compare tuning in CRF and eCRF. By placing the dynamic stimulus within the CRF (to 0.5 x CRF), we could probe the orientation tuning of facilitation for all neurons rather than the restricted population that showed facilitation from the eCRF border. We compared the tuning of the facilitation (arising from extension of the CRF) and tuned suppression (from the eCRF) in individual neurons, by measuring the orientations eliciting peak responses and tuning bandwidths. For each neuron, orientation tuning of facilitation and suppression were averaged over the windows around the peak effect (red and blue bars for the example neuron in Figure 5A); timing windows were adjusted on a per-neuron basis.

Orientation tuning was similar for facilitation and tuned suppression. In an example neuron (Figure 5B-C) the peak tuning for both mechanisms was around orientations collinear to the neuron's CRF preference. For the population, the peak orientations for tuned facilitation and tuned suppression were within 20 degrees of each other (Figure 5D, F). Measures of local selectivity for orientation around the peak (bandwidth) were similarly distributed for both facilitation and suppression (Figure 5E,G), although within individual cells we found only a weak and not statistically significant relationship between the two bandwidths (Figure 5H, Pearson's correlation,  $r=0.22$ ,  $p=0.14$ ). More global measures of selectivity (the response ratio at orthogonal to preferred orientations) showed a moderate relationship between the tuning for facilitation and suppression (Pearson's correlation,  $r=0.29$ ,  $p=0.051$ ). Overall, the tuned component of eCRF suppression spanned the same range of selectivity and tuning as that of the facilitation elicited from within and near the CRF, a comparison only made possible by isolating eCRF component mechanisms.

### **Modeling of Overlapping eCRF Mechanisms**

The dynamics of eCRF modulation depend on the spatial extent and orientation of the stimulus within the eCRF. Consequently, a given eCRF stimulus may recruit multiple underlying eCRF mechanisms with distinct signs and spatio-temporal profiles. As such, changes in stimulus duration have the potential to alter the net observed steady-state eCRF modulation during stimulus presentation. Briefly presented stimuli will result in a relatively greater influence of short latency eCRF mechanisms; prolonged stimuli will allow both short- and long-latency eCRF mechanisms to modulate CRF responses.

To understand how changes in stimulus properties affect eCRF measurements, we modeled eCRF modulation as a combination of multiple mechanisms with distinct spatio-temporal

dynamics. First, we modeled the response to eCRF stimuli presented collinear with the CRF stimulus, where the eCRF modulation results from a combination of short-latency moderate facilitation and long-latency stronger suppression, akin to the modulation mechanisms we identified in V1. We simulated a range of stimulus durations from 10 - 1920 ms (Figure 6A); for each condition, eCRF modulation was quantified as the average response modulation over the entire stimulus presentation. For brief presentations (< 40ms), there was no net eCRF modulation, because both eCRF mechanisms had some intrinsic delay (Figure 6A). For intermediate durations (60-120ms) the model showed net facilitation, because short-latency facilitation was engaged and had greater impact than delayed suppression. For longer durations (> 200ms), stronger long-latency suppression dominated resulting in net suppressive modulation (Figure 6A). Thus even for a stimulus of fixed orientation in the eCRF, changing stimulus duration altered both the sign and magnitude of net eCRF modulation.

We also modeled the effect of changing stimulus duration when the eCRF consisted of two separate underlying suppressive mechanisms: a short-latency orientation-untuned and a longer-latency orientation-tuned mechanism (shown by the model eCRF kernel in Figure 6B). We measured the steady-state suppression index as a function of eCRF orientation. For stimuli of short-duration there is no modulation (40-60ms) (Figure 6C). For stimulus durations of 80-100ms the measurable eCRF suppression was largely unselective for orientation. For stimulus durations >200ms the response reflected a combination of both orientation-untuned and orientation-tuned mechanisms. As these model responses illustrate, even stimuli of a fixed spatial configuration will produce dramatically distinct net modulations of CRF responses as the stimulus duration is varied and distinct underlying eCRF mechanisms are recruited.

## Discussion

In the current study, by probing the dynamics of eCRF modulation, we found three component mechanisms with distinct timing and spatial profiles: orientation-tuned facilitation, untuned suppression, and tuned suppression. Neurons in different cortical laminae had distinct patterns of eCRF modulation that partially segregated with input layer processing streams, and were elaborated along distinct corticocortical output pathways. Here we describe what these findings can tell us about neural mechanisms and about the role of eCRF modulation in sensory coding.

### Mechanisms of eCRF Modulation and Link to V1 Laminar Circuits

***Tuned Facilitation.*** Facilitation occurred early, was spatially localized to regions within and near the CRF, and generally matched the preferred orientation of the CRF. This eCRF-facilitation component thus likely arises from the same mechanisms generating visual responses in the CRF. In most cells facilitation was orientation tuned. Thus we propose that the tuned facilitatory component of eCRF modulation is generated in the compact local circuitry of a few neighboring cortical hypercolumns that generates CRF signals.

Some studies have reported facilitation from ‘far’ regions of the eCRF (Schwabe et al., 2006; Ichida et al., 2007), but generally only when a low contrast stimulus drove the CRF and when stimuli were absent from regions of the ‘near’ surround. In our study, there was always a stimulus covering the near surround, which might explain the lack of facilitation at the largest spatial extents. In contrast, earlier studies that reported strong facilitation (Kapadia et al., 1995; Polat et al., 1998; Kapadia et al., 2000) found facilitation only from flanking stimuli that were relatively close to the CRF. This facilitation is consistent with the spatiotemporal scale of facilitation that we observed and have localized to extensions of a central CRF mechanism.. Further, stimuli in these studies were often presented over fairly brief durations, which as our



modeling results illustrate will bias net modulation towards this shortest-latency facilitation component.

There was a pronounced facilitation at the orthogonal-to-preferred orientation in the average layer 5 eCRF dynamics (Figure 4E) that was also seen, although with a reduced amplitude, in the dynamics from layer 4B, 4C and 6 (Figure 4B, D, F). Earlier studies reported examples of orthogonal eCRF facilitation (Levitt and Lund, 1997; Jones et al., 2002) although the layers of the recorded neurons were not reported. The average dynamics from layers 5 and 6 (Figure 4E, F) also showed tuned facilitation at the preferred orientation. The peak time of the facilitation at the preferred orientation was 25–50 ms earlier than orthogonal facilitation for the layer 5 kernels (Figure 4E), suggesting that different circuits contributed to these two components.

***Untuned suppression.*** We found that the untuned component of eCRF suppression arose early and was associated with V1 layers receiving or relaying LGN-magnocellular input. This suggests that a proportion of V1 untuned suppression may arise from subcortical eCRF suppression (Webb et al., 2005), which has been found in magnocellular–projecting retinal ganglion cells (Solomon et al. 2006) and in magnocellular LGN cells (Solomon et al., 2002; Sceniak et al., 2006; Alitto and Usrey, 2008). The short latency, limited spatial scale, and lack of orientation tuning of this component of suppression are consistent with the idea that it derives from feedforward magnocellular LGN input. However, our results suggest that some untuned suppression may arise from local, lateral cortico-cortical inhibition. While we found that untuned suppression was reduced in strength at distances beyond 2x eCRF border, it was not zero at this larger spatial scale. Broad distributions in the strength and time to peak of this untuned suppression (Figure 2) also suggest additional cortical processing beyond common inherited effects from the LGN.

Although untuned suppression was most prevalent in Layer 4B, it was also observed in individual neurons in the parvocellular input layer 4C $\beta$  and in layers 2/3 – although it was lost in the average of layer 2/3 – and it was found with a delay of 100 ms or more. This delayed component of untuned suppression in neurons with parvocellular-dominated input is likely to be cortically-generated because eCRF suppression is not observed in parvocellular LGN cells (Alitto and Usrey, 2008). Together, the evidence suggests that untuned suppression may result from multiple processes, including suppression in magnocellular LGN feedforward input as well as lateral cortico-cortical inhibition.

In a previous study, using steady state stimulation (Henry et al., 2013), we reported that for some neurons the eCRF suppression in layers 2/3 showed components that had high contrast sensitivities, indicative of M-pathway involvement. Furthermore, the suppression was strong at both collinear and orthogonal eCRF orientations, indicating that the untuned component was contributing. In the current results the main early component is also untuned and we attribute this to the M-pathway, which has characteristically high contrast sensitivity (Kaplan and Shapley, 1986). These results refine the view that there are both tuned and untuned components of the eCRF (Henry et al., 2013, Nurminen and Angelucci, 2014); the untuned component of eCRF suppression may be predominantly derived from magnocellular signals relayed by 4C $\alpha$  neurons to neurons in other V1 layers.

A recent study on timing of eCRF effects between layers did not appear to show strong M and P-pathway separation (Bijanzadeh et al., 2018). However, it is difficult to compare the results of our current study with the Bijanzadeh et al. study that recorded LFP and MUA using a fixed size of CRF and eCRF stimuli because probing for local untuned suppression depends on the measuring the border between the CRF and eCRF, which may differ for individual neurons.

**Tuned suppression.** Tuned suppression was observed in both input layers and very prominently in layers 2/3. Layer 2/3 suppression peaked at times quite delayed compared to facilitation. Both the orientation selectivity and delayed emergence of this tuned suppression are consistent with it arising as a result of cortico-cortical lateral interactions, as often postulated before (reviewed in Angelucci et al., 2017). We found that this suppressive component arises from extended spatial scales, with most of it generated by the activity of V1 neurons with receptive fields more than 2 x CRF radius away from the recorded neuron. Long-distance V1 lateral connections must be in some way selective for the orientation of their targets in order to support such long-range tuned suppression. If instead this suppression is caused in part by extra-striate feedback (Angelucci et al., 2002, 2017; Nassi et al., 2013), then those feedback circuits must also be matched in orientation selectivity to their V1 targets. Tuned suppression is also present in layer 4B but it differs quantitatively from that of layers 2/3. In layer 4B, tuned suppression is very rapid, and overlaps to some extent with untuned suppression (Figure 4B), partially obscuring its presence. We examined a small sample of layer 4B cells ( $n = 6$ ) probed using eCRF stimuli with an inner radius of 2x eCRF border, a scale where the early untuned suppression is no longer present, and found strong early tuned suppression (Suppl. Figure 2D). These results point towards a fast, tuned suppression mechanism specific to layer 4B, distinct from that seen in layers 2/3. These results imply that tuned suppression may also be elaborated via multiple circuit mechanisms along distinct cortico-cortical output pathways.

We found that the orientation selectivity of the tuned component of eCRF suppression was similar to that of facilitation arising from regions near the CRF. Yet earlier studies concluded that the tuning of eCRF suppression was broader than that of the CRF (Webb et al., 2005). However, these inferences were based on steady-state responses that included both the untuned and tuned components of eCRF suppression and did not discriminate between them.

## Relation to Previous Work on eCRF Modulation

During prolonged visual stimulation with extended patterns, steady-state measurements of eCRF modulation incorporate both facilitatory and suppressive eCRF mechanisms, owing to the fact that their response dynamics are fast compared to stimulus presentation times. In the modeling responses to stimuli with shorter presentation durations, as often used in psychophysical studies, the relative contributions of these mechanisms depended on stimulus presentation time (Figure 6). This was due to the fact that the components of facilitation and suppression have distinct temporal profiles. These new results help to reconcile seemingly contradictory results in the literature.

Studies of eCRF modulation that used large collinear annular gratings drifting for hundreds of milliseconds to many seconds typically reported finding strong eCRF collinear suppression but little or no collinear facilitation (Levitt and Lund, 1997; Hupe et al., 2001; Sceniak et al., 2001; Levitt and Lund, 2002; Cavanaugh et al., 2002a; Jones et al., 2002; Shushruth et al., 2012; Nassi et al., 2013; Henry et al., 2013; Trott and Born, 2015). Other studies, that used briefly presented spatially-localized stimuli flanking the CRF (Kapadia et al., 1995; Kapadia et al., 2000), reported a high prevalence of collinear facilitation. In the current study, we observed both types of responses. We found an early facilitation from the defined eCRF border in about 25% of neurons. Most neurons that showed an early facilitation possessed tuned suppression that was temporally delayed (Figure 3E). With this biphasic temporal profile, integration of the spiking response over short epochs yields facilitation compared to CRF stimulation alone (Figure 6) as observed by Kapadia et al. (2000). Integration of the response over longer stimulus durations leads to net measured suppression as the stronger, delayed suppressive component dominates over facilitation (Figure 6), as reported in many studies (Jones et al., 2001; Sceniak et al., 2001; Cavanaugh et al., 2002b; Webb et al., 2005; Hallum and Movshon, 2014; Trott and Born, 2015). We suggest that these differences in temporal integration among

multiple eCRF components provide a parsimonious explanation for many previous conflicting reports about eCRF facilitation (and lack thereof).

### **Implications for Cortical Normalization**

Through recent work, it has been increasingly argued that normalization represents a ‘canonical computation’ in neuronal circuits, a computational motif repeated in each cortical area to adjust individual neuronal responses based on the average population activity (Carandini and Heeger, 2011). Normalization models have proved a useful quantitative framework for characterizing spatial nonlinearities in neuronal responses, ranging from contrast gain control in retinal ganglion cells (Shapley and Victor, 1979) to cross-orientation suppression within V1 CRFs (Carandini et al., 1997) and V1 eCRF modulation (Cavanaugh et al., 2002a,b). While some studies dissect normalization into equivalent specific mechanistic classes such as ‘tuned’ normalization (Verhoef and Maunsell 2017; Ni and Maunsell, 2017), often the assumption is that all neurons within a given cortical area possess the same response gating from a single normalization process. As our results in V1 highlight, there are clear differences at the microcircuit level in the scale, tuning and timing of recruited normalization processes. This diversity across neurons is partially explained by laminar differences in overall connectivity with the magnocellular and parvocellular pathways in the cortical input layer. However, even the ‘tuned’ normalization we observe in the V1 output layers shows clear distinctions in timing between layers 2/3 and 4B, suggesting further elaborated and segregated microcircuits.

Normalization has been proposed as a computation that serves to adjust neurons’ responses to span a non-saturating operating range (Ringach, 2010) and reduce redundancy across the population (Schwartz and Simoncelli, 2001). Within this framework, our results suggest that it is incorrect to equate one cortical area with one canonical normalization process common to all neurons. Instead, it may prove more fruitful to dissect the cortical circuit into functional modules

based on their downstream targets and ask what consequences specific normalization mechanisms have for signaling in broader recurrent circuits. In part, this diversity in normalization has been shown to underlie generation of increasing RF selectivity (Xing 2005, 2011), resulting in distinct spatiotemporal transformations from the input layer to the various cortical output pathways.

### **Implications for Perception and Models of Cortical Processing**

These findings of multiple component mechanisms of eCRF modulation with different dynamics lead to interesting predictions for visual perception. It predicts that extended stimuli with varied spatial structure will differentially affect the coding of localized stimuli, a phenomenon well-characterized in perceptual studies of meta-contrast masking (Ishikawa et al., 2006). Further, it predicts that stimuli of *identical* spatial structure may influence perception differently, depending on the time frame over which they are viewed. For example, a study that measured discrimination by human and rodent subjects of a central grating patch in the presence of a surrounding patch reported different outcomes between the two species (Meier and Reinagel, 2013). There were subtle differences in the temporal presentation of the stimuli in this study. With short duration presentation in the human subjects, surround facilitation was observed, whereas in rats, where there was a longer duration of presentation, there was suppression. The study concluded that there were species differences in eCRF modulation. However, an alternative explanation could be that these modulation differences were due to changes in presentation duration as shown by our modeling results. With increased stimulus presentation time, the balance shifts from facilitation-dominated to suppression-dominated eCRF modulation. This implies that qualitatively different information about spatial context is being signaled at different points in time following fixation onset, which will dynamically alter the information about the world that is available to organisms to make use of in guiding their behavior.

Statistical models using CRF-eCRF based neuronal interactions under conditions of natural viewing (Coen-Cagli et al., 2012) make a number of predictions about perceptual saliency that match human performance qualitatively. Currently such models are descriptive and static; they do not have any underlying dynamics built-in to the receptive field modulation, nor do they allow for potentially different computational goals within the cortical microcircuit. However, cortical processing under natural viewing conditions will engage both spatial and temporal components of receptive fields partly due to continuous eye-movements (Rucci and Victor, 2015). Future models should take into account both the known dynamics of these multiple neural mechanisms that comprise the eCRF as well as the pathway-specific differences of these dynamics in order to characterize more precisely the contextual information relayed from V1 populations to their distinct downstream targets in higher visual cortical areas.

**Conflict of interest:** The authors declare no competing financial interests

**Author Contribution:** C.A.H., M.J., R.M.S., and M.J.H. designed the analyses. C.A.H. and M.J.H. performed all the analyses. C.A.H., M.J., R.M.S., and M.J.H. designed and performed the experiments. C.A.H., R.M.S., and M.J.H. wrote the manuscript.

**Acknowledgements:** This work was supported by NIH R01 EY008300 (M.J.H) and R01 EY001472 (R.M.S.).

## Methods

### Preparation

Experiments were undertaken on adult male macaque monkeys in compliance with National Institutes of Health and New York University Animal Use Committee regulations. Detailed procedures have been described previously (Hawken et al., 1996; Ringach et al., 2002; Xing et al., 2005). Single unit recordings were made in anesthetized, paralyzed animals. Initial sedation was induced with ketamine, (5 – 20 mg/kg, i.m.) followed by initial surgical preparation under isoflurane anesthesia (1-3%). Recording was carried out using sufentanil anesthesia (6-18  $\mu\text{g}/\text{kg}/\text{h}$ , i.v.) and animals were paralyzed with vecuronium bromide (Norcuron: 0.1 mg/kg/h, i.v.). We continuously monitored heart rate, electrocardiogram, blood pressure, expired  $\text{CO}_2$ , and electroencephalogram to ensure the maintenance of anesthesia and stable physiological state. The pupils were dilated with atropine sulfate (1%) and during the experiment the eyes were protected by clear, gas-permeable contact lenses and application of gentamicin sulfate (3%), a topical antibiotic solution. Fixation rings (Duckworth and Kent) were used to minimize any residual eye movements in most experiments and, when used, an ophthalmic anti-inflammatory agent (TobraDex) was also applied.

### Recording and Visual Stimulation

Single unit recording and recovery of electrode penetrations were the same as recently described (Henry et al., 2013). The receptive fields were initially mapped on a tangent screen,



eccentricities were between 1 and 6°. For quantitative studies stimuli were displayed at a screen resolution of 1024 x 768 pixels and a refresh rate of 100 Hz. The stimuli were presented on either a Sony Trinitron GDM-F520 CRT monitor or an Iiyama HM204DT-A CRT monitor with mean luminances of 90–100 cd/m<sup>2</sup> and 60 cd/m<sup>2</sup>, respectively. The monitors' luminance was calibrated using a spectroradiometer (Photo Research PR-650) and linearized via a lookup table in custom software. Each eye was optimally refracted for the 115 cm monitor viewing distance using external lenses.

### **Characterization and Determination of CRF and eCRF**

Neurons were initially characterized to determine the optimal tuning parameters for orientation, spatial frequency, temporal frequency as in Henry et al. (2013). Optimal parameters were used for the stimulus in the CRF in all the experiments performed with the dynamic surround stimulation. Initial experiments were also performed to measure neurons' contrast response functions as well as their size tuning functions (for grating patches and annular gratings) to define the boundary between the classical and extra-classical receptive fields (Henry et al., 2013).

### **Dynamic Stimulus**

The eCRF stimulus in this study was a dynamic stimulus that was used to map the spatiotemporal impulse-response to oriented gratings in the eCRF. A small patch of drifting sinusoidal grating (of optimal orientation, spatial frequency, and temporal frequency) was presented over the CRF to elicit spiking from the neuron; the contrast of the grating was set to a level eliciting 50% of the maximum response from a neuron in order to be able to detect both increases and decreases in firing due to the surrounding spatial context. Outside of this grating patch (in an abutting annulus) we presented a rapid dynamic stimulus sequence of high-contrast (99%) drifting gratings changing in orientation (Figure 1A). The annular gratings in the eCRF

had the same spatial and temporal frequency as the CRF grating, and consisted of 18 orientations separated by 20 degree steps; each grating was presented for two monitor frames (20ms at 100 Hz refresh). The dynamic gratings were presented at one of two spatial phases, either identical to the spatial phase of the coincident central grating or 180 degrees phase offset from it. Thus, annular gratings collinear to the central grating (when the relative orientation difference was 0 degrees) were either in-phase or out-of-phase with the grating in the CRF; the analysis of eCRF modulation described for most data sets averages over both spatial phases. Occasionally, the annular stimulus contained a screen of mean grey luminance (blank) for 2 frames instead of a sinusoidal grating; this blank stimulus was included for reference to compare with the influence of surrounding gratings (Figure 1A).

The outer edge of the annulus was windowed by a square aperture, typically of a width of 8 degrees of visual angle. We set the radius of the stimulus (the radius of the central grating as well as the inner radius of the dynamic annulus) to be the size of the eCRF boundary (see Figure 3E). The eCRF boundary was determined by the smallest radius at which a neuron gives a peak response to a central grating and the smallest inner radius of a grating annulus that elicits no response from the neuron. The larger of these two sizes was defined as the eCRF boundary. For all neurons, we collected data where the border between the central grating and annular grating stimuli was set to the determined eCRF boundary. For a subset of neurons, we ran further experiments in which we presented stimuli with borders that were set to sizes half (Figure 3D) and twice that of the eCRF boundary (Figure 3F). For example, at smaller sizes this means that the central drifting grating has a smaller radius and the dynamic annulus also has a smaller inner annulus; they remained spatially abutting. The same applied to the condition when the eCRF boundary was twice the radius for the border condition. Varying the spatial location of the stimulus border was designed to allow us to compare eCRF modulations at different spatial extents with regard to the CRF-eCRF border.

## Data Analysis

### Reverse-correlation

Analysis of the neural responses consisted of standard subspace reverse-correlation methods (Ringach et al., 1997); a schematic illustrating the analysis is shown in Figure 1A. Based on the neuron's spiking activity, we can calculate the probability that a specific orientation in the surround ( $\theta$ ) was presented at a given time ( $\tau$ ) prior to a spike:  $p(\theta | \tau, \text{spike})$ . Similarly we can calculate the probability that a mean grey luminance stimulus was on in the eCRF prior to a spike:  $p(\text{blank} | \tau, \text{spike})$ . The modulation of spiking that results from a specific orientation in the eCRF is calculated as the log odds-ratio of these two probabilities:  $\log ( p(\theta | \tau, \text{spike}) / p(\text{blank} | \tau, \text{spike}) )$ . Positive values of log odds-ratio indicate that the oriented grating occurred more often on average (at a given time prior to spikes) than a blank stimulus, which we interpret as the eCRF surround grating driving spiking activity (facilitation from the eCRF). Negative values of log odds-ratio indicate that the oriented grating occurred less often on average than a blank, which we interpret as decreases in spiking activity (suppression from the eCRF). Gratings that evoke no response modulation from the eCRF will occur with an equal probability to the blank stimulus prior to spiking, and will have log odds-ratios near zero (Figure 1B). All of these probabilities are calculated at multiple times prior to spiking, with tau ranging from 0 to 200 ms (Figure 1D-F). At extremely short or long values of tau, there will be no effect and the probability of any given stimulus will be equal to that of a blank (Figure 1B). At intermediate time scales, there may be modulatory influence that leads to given surround stimuli occurring more or less often than a blank (Figure 1C). In the example cartoon, there is an increase in probability at the same orientation (collinear) as the CRF stimulus; this would be interpreted as facilitation.

The constant center stimulus and dynamic surround maintain the system in a constant state of adaptation or normalization. Even though the center stimulus is not broadband, it is driving the neuron with a relatively constant rate and the dynamic pattern in the surround is keeping the surround in a constant level of adaptation. Therefore the timing of the response components is due to small signal perturbation operating in a linear range.

### **Quantifying Components of eCRF Modulation**

The LORs gave us the temporal impulse-response modulation produced by a given grating in the eCRF. To determine the statistical significance of these impulse-responses, we normalized the log-odds ratios by transforming them into z-scores by dividing by the standard deviation of the noise in the kernels. The earliest signals that arrive in V1 when a stimulus is presented occur around 30ms due to the inherent latencies in the feed-forward neural circuitry (Maunsell and Gibson, 1992). Thus, any measured values that arrive earlier than that are assumed to be due to noise; we used the standard deviation of the LORs (across all stimuli) in the range of 0-20ms prior to spiking activity as our estimate of the variance in the data and use this to convert the LORs into z-scores. Non-parametric estimation of confidence bounds on the spatio-temporal kernels (via bootstrap resampling) led to similar measures of significance.

We measured multiple attributes of the strength and timing of eCRF modulation, and used these measures to characterize multiple component mechanisms underlying eCRF modulation.

Averaging the impulse-responses for orientations near collinear with the central grating ( $0 \pm 20$  and  $180 \pm 20$  degrees relative to center), we can measure the strength and timing of both facilitation and suppression; we refer to these as orientation-tuned mechanisms. The magnitude of these mechanisms is the peak z-scored value over the time course of the response (peak positive value for facilitation and peak negative value for suppression). This also gave us the time of the peak response; to calculate response onset and offset, we found

the latest time prior to peak and earliest time after the peak where the response dropped below a z-scored value of 2. Additionally, we measured the magnitude and timing for responses that were orthogonal (averaged over orientations  $90 \pm 20$  and  $270 \pm 20$  degrees relative to center); we refer to these as orientation untuned mechanisms.

## Modeling

Modeling of multiple eCRF mechanisms was carried out to illustrate the manner in which stimulus duration influences the average modulation observed in single neurons from surround stimuli. Neural response to an optimal CRF stimulus was modeled as a homogenous Poisson process firing at an average rate of 60 Hz. Modulation from eCRF stimuli were modeled as multiplicative (divisive) temporal gain changes of this CRF drive, for mechanisms of eCRF facilitation (suppression). The temporal kernel for facilitation ( $K_f$ ) was a Gaussian profile in time (amplitude: 1.2,  $\mu$  – time of peak response: 50ms, s.d.: 5ms); the temporal kernel for suppression ( $K_s$ ) was a Gaussian profile (amplitude: 1.7,  $\mu$ : 80ms, s.d.: 10ms). For comparison of mixtures of facilitation and suppression, the total temporal impulse-response from the eCRF ( $K_{total}$ ) was  $K_{total} = (1 + K_f) / (1 + K_s)$ ; the constant of 1 in the numerator (denominator) is equivalent to unitary gain (no change) in the absence of eCRF facilitation (suppression). The duration of eCRF stimuli were sampled from a range of 10-1920ms. Neuronal responses were modeled by convolving the eCRF kernel ( $K_{total}$ ) with the surround stimulus sequence, and using the time-dependent output to modulate the gain of the Poisson process representing CRF stimulus drive. For each stimulus duration, average eCRF modulation was quantified by taking the mean firing rates over the entire period of stimulus presentation. Modulation index was calculated as  $(R_{CRF+eCRF} - R_{CRF})/R_{CRF}$ , whereby positive (negative) values indicate eCRF facilitation (suppression).

To illustrate how the average tuning of eCRF suppression is dependent upon stimulus duration when multiple suppressive mechanisms are present in the eCRF, we modeled eCRF suppression as a combination of untuned and tuned components with distinct spatiotemporal profiles. The temporal kernel for untuned suppression ( $K_{us}$ ) was a Gaussian profile (amplitude: 1.1,  $\mu$ : 60ms, s.d: 7ms) and for tuned suppression ( $K_{ts}$ ) was a temporal kernel of longer latency and duration (amplitude: 1.1,  $\mu$ : 80ms, s.d. 10ms). Untuned suppression was equal for all orientations presented in the eCRF; tuned suppression was created by scaling the amplitude  $K_{ts}$  by a Von Mises function  $\alpha$ , ranging in amplitude from 0 to 1 (peak orientation: 0 deg, half-width at half height: 30 deg). Thus, the temporal impulse-response for all suppression from the eCRF ( $K_{total}$ ) was  $K_{total} = 1 / (1 + K_{us}) * (1 + \alpha * K_{ts})$ . Stimulus duration was varied as above, and an average suppression index for each stimulus duration and eCRF orientation was calculated as  $1 - (R_{CRF+eCRF})/R_{CRF}$ .

## References

- Alitto HJ, Usrey WM (2008) Origin and dynamics of extraclassical suppression in the lateral geniculate nucleus of the macaque monkey. *Neuron* 57:135–146.
- Allman J, Miezin F, McGuinness E (1985) Stimulus specific responses from beyond the classical receptive field: neurophysiological mechanisms for local-global comparisons in visual neurons. *Ann Rev Neurosci* 8: 407–430.
- Angelucci A, Levitt JB, Walton EJS, Hupe JM, Bullier J, Lund JS (2002) Circuits for local and global signal integration in primary visual cortex. *J Neurosci* 22: 8633-8646.
- Angelucci A, Bijanzadeh M, Nurminen L, Federer F, Merlin S, Bressloff P (2017) Circuits and mechanisms for surround modulation in visual cortex. *Ann Rev Neurosci* 40:425-451.
- Bijanzadeh M, Nurminen L, Merlin S, Clark AM, Angelucci A (2018) Distinct laminar processing of local and global context in primate primary visual cortex. *Neuron* 100:259-274.
- Bredfeldt CE, Ringach DL (2002) Dynamics of spatial frequency tuning in macaque V1. *J Neurosci* 22: 1976-1984.
- Carandini M, Heeger DJ, Movshon JA (1997) Linearity and normalization in simple cells of the macaque primary visual cortex. *J Neurosci* 17: 8621–8644.
- Carandini M, Heeger DJ (2011) Normalization as a canonical neural computation. *Nat Rev Neurosci*.13:51-62.
- Cavanaugh JR, Bair W, Movshon JA (2002a) Nature and interaction of signals from the receptive field center and surround in macaque V1 neurons. *J Neurophysiol* 88: 2530 –2546.
- Cavanaugh JR, Bair W, Movshon JA (2002b) Selectivity and spatial distribution of signals from the receptive field surround in macaque V1 neurons. *J Neurophysiol* 88: 2547–2556.
- Coen-Cagli R, Dayan P, Schwartz O (2012) Cortical surround interactions and perceptual salience via natural scene statistics. *PLoS Comput Biol* 8:e1002405.
- Conway BR (2014) Color signals through dorsal and ventral visual pathways. *Vis Neurosci* 31:197-209.
- Goodale MA (2014) How (and why) the visual control of action differs from visual perception. *Proc Biol Sci* 281: 20140337.
- Hawken MJ, Shapley RM, Groszof DH (1996) Temporal frequency selectivity in monkey lateral geniculate nucleus and striate cortex. *Vis Neurosci* 13: 477 - 492.
- Hallum LE, Movshon JA (2014) Surround suppression supports second-order feature encoding by macaque V1 and V2 neurons. *Vis Res* 104: 24-35.
- Henry CA, Joshi S, Xing D, Shapley RM, Hawken MJ (2013) Extra-classical receptive field contrast sensitivity and contrast gain of neurons in macaque V1. *J Neurosci* 33: 6230-6242.

Hubel DH, Wiesel TN (1962) Receptive fields, binocular interaction and functional architecture in the cat's visual cortex. *J Physiol* 160: 106–154.

Hubel DH, Wiesel TN (1968) Receptive fields and functional architecture of monkey striate cortex. *J Physiol* 195: 215–243.

Hupé JM, James AC, Girard P, Bullier J (2001) Response modulations by static texture surround in area V1 of the macaque monkey do not depend on feedback connections from V2. *J Neurophysiol* 85: 146-163.

Ichida JM, Schwabe L, Bressloff PC, Angelucci A (2007) Response facilitation from the “suppressive” receptive field surround of macaque V1 neurons. *J Neurophysiol* 98: 2168 –2181.

Ishikawa A, Shimegi S, Sato H (2006) Metacontrast masking suggests interaction between visual pathways with different spatial and temporal properties. *Vis Res* 46: 2130-2138.

Jones HE, Grieve KL, Wang W, Sillito AM (2001) Surround suppression in primate V1. *J Neurophysiol* 86: 2011-2028.

Jones HE, Wang W, Sillito AM (2002) Spatial organization and magnitude of orientation contrast interactions in primate V1. *J Neurophysiol* 88: 2796-2808.

Jones HE, Andolina IM, Ahmed B, Shipp SD, Clements JT, Grieve KL, Cudeiro J, Salt TE, Sillito AM (2012) Differential feedback modulation of center and surround mechanisms in parvocellular cells in the visual thalamus. *J Neurosci* 32: 15946-15951.

Kapadia MK, Ito M, Gilbert CD, Westheimer G (1995) Improvement in visual sensitivity by changes in local context: parallel studies in human observers and in V1 of alert monkeys. *Neuron* 15: 843–856.

Kapadia MK, Westheimer G, Gilbert CD (2000) Spatial distribution of contextual interactions in primary visual cortex and in visual perception. *J Neurophysiol* 84: 2048 –2062.

Kaplan E, Shapley RM (1986) The primate retina contains two types of ganglion cells, with high and low contrast sensitivity. *Proc Natl Acad Sci U S A* 83: 2755–2757.

Klauke S, Wachtler T (2015) "Tilt" in color space: Hue changes induced by chromatic surrounds. *J Vis* 15-13:17.

Kogo N, Wagemans J (2013) The "side" matters: how configural is reflected in completion. *Cogn Neurosci* 4: 31-45.

Kravitz DJ, Saleem KS, Baker CI, Ungerleider LG, Mishkin M (2013) The ventral visual pathway: an expanded neural framework for the processing of object quality. *Trends Cogn Sci* 17: 26-49.

Lamme VA (1995) The neurophysiology of figure-ground segregation in primary visual cortex. *J Neurosci* 15: 1605–1615.

Levitt JB, Lund JS (1997) Contrast dependence of contextual effects in primate visual cortex. *Nature* 387: 73–76.



Levitt JB, Lund JS (2002) The spatial extent over which neurons in macaque striate cortex pool visual signals. *Vis Neurosci* 19: 439–452.

Maunsell JHR, Gibson JR (1992) Visual response latencies in striate cortex of the macaque monkey. *J Neurophysiol* 68: 1332–1344.

Meese TS, Challinor KL, Summers RJ, Baker DH (2009) Suppression pathways saturate with contrast for parallel surrounds but not for superimposed cross-oriented masks. *Vis Res* 49: 2927-2935.

Meese TS, Baker DH (2013) A common rule for integration and suppression of luminance contrast across eyes, space, time, and pattern. *Iperception* 4: 1-16.

Meier PM, Reinagel P (2013) Rats and humans differ in processing collinear visual features. *Frontiers in Neural Circuits* 197: 1-8.

Müller JR, Metha AB, Krauskopf J, Lennie P (2003) Local signals from beyond the receptive fields of striate cortical neurons. *J Neurophysiol* 90: 822-831.

Nassi JJ, Lomber SG, Born RT (2013) Corticocortical feedback contributes to surround suppression in V1 of the alert primate. *J Neurosci* 33: 8504-8517.

Ni AM, Maunsell JHR (2017) Spatially tuned normalization explains attention modulation variance within neurons. *J Neurophysiol* 118: 1903-1913.

Nowak LG, Munk MHJ, Girard P, Bullier J (1995) Visual latencies in areas V1 and V2 of the macaque monkey. *Vis Neurosci* 12: 371–384.

Nurminen L, Angelucci A (2014) Multiple components of surround modulation in primary visual cortex: multiple circuits with multiple functions? *Vis Res* 104: 47-56.

Polat U, Mizobe K, Pettet MW, Kasamatsu T, Norcia AM (1998) Collinear stimuli regulate visual responses depending on cell's contrast threshold. *Nature* 391: 580-584.

Ringach DL, Hawken MJ, Shapley R (1997) Dynamics of orientation tuning in macaque primary visual cortex. *Nature* 387: 281–284.

Ringach D, Shapley RM, Hawken MJ (2002) Orientation selectivity in macaque V1: diversity and laminar dependence. *J. Neurosci* 22: 5639-5651.

Ringach DL, Hawken MJ, Shapley RM (2003) Dynamics of orientation tuning in macaque V1: the role of global and tuned suppression. *J Neurophysiol* 90: 342 – 352.

Ringach DL (2010) Population coding under normalization. *Vis Res* 50: 2223-2232.

Rucci M, Victor JD (2015) The unsteady eye: an information-processing stage, not a bug. *Trends Neurosci* 38:195-206.

Russell AF, Mihalas S, von der Heydt R, Niebur E, Etienne-Cummings R (2014) A model of proto-object based saliency. *Vis Res* 94: 1-15.

Sceniak MP, Hawken MJ, Shapley R (2001) Visual spatial characterization of macaque V1 neurons. *J Neurophysiol* 85: 1873–1887.

Sceniak MP, Chatterjee S, Callaway EM. (2006) Visual spatial summation in macaque geniculocortical afferents. *J Neurophysiol* 96: 3474–3484.

Schwabe L, Obermayer K, Angelucci A, Bressloff PC (2006) The role of feedback in shaping the extra-classical receptive field of cortical neurons: a recurrent network model. *J Neurosci* 26: 9117–9129.

Schwartz O, Simoncelli EP (2001) Natural signal statistics and sensory gain control. *Nat Neurosci* 4: 819-825.

Shapley R, Victor JD (1979) The contrast gain control of the cat retina. *Vis Res* 19: 431–434.

Shushruth S, Mangapathy P, Ichida JM, Bressloff PC, Schwabe L, Angelucci A (2012) Strong recurrent networks compute the orientation tuning of surround modulation in the primate primary visual cortex. *J Neurosci* 32: 308 –321.

Smith MA, Bair W, Movshon JA (2006) Dynamics of suppression in macaque primary visual cortex. *J Neurosci* 26: 4826-4834.

Solomon SG, White AJR, Martin PR. (2002) Extra-classical receptive field properties of parvocellular, magnocellular, and koniocellular cells in the primate lateral geniculate nucleus. *J. Neurosci* 22: 338–349.

Solomon SG, Lee BB, Sun H (2006) Suppressive surrounds and contrast gain in magnocellular-pathway retinal ganglion cells of macaque. *J Neurosci* 26: 8715-8726.

Tanabe S, Haefner RM, Cumming BG (2011) Suppressive mechanisms in monkey V1 help to solve the stereo correspondence problem. *J Neurosci* 31: 8295-8305.

Tanabe S, Cumming BG (2014) Delayed suppression shapes disparity selective responses in monkey V1. *J Neurophysiol* 111: 1759-1769.

Trott AR, Born RT (2015) Input-gain control produces feature-specific surround suppression. *J Neurosci* 35: 4973-4982.

Verhoef BE, Maunsell JHR (2017) Attention-related changes in correlated neuronal activity arise from normalization mechanisms. *Nat Neurosci* 20:969-977.

Webb BS, Dhruv NT, Solomon SG, Tailby C, Lennie P (2005) Early and late mechanisms of surround suppression in striate cortex of macaque. *J Neurosci* 25: 11666 –11675.

Xing D Shapley RM, Hawken MJ, Ringach DL (2005) The effect of stimulus size on the dynamics of orientation selectivity in macaque V1. *J Neurophysiol* 94:799-812.

Xing D, Ringach DL, Hawken MJ, Shapley RM (2011) Untuned suppression makes a major contribution to the enhancement of orientation selectivity in macaque V1. *J Neurosci* 31:15972-15982.

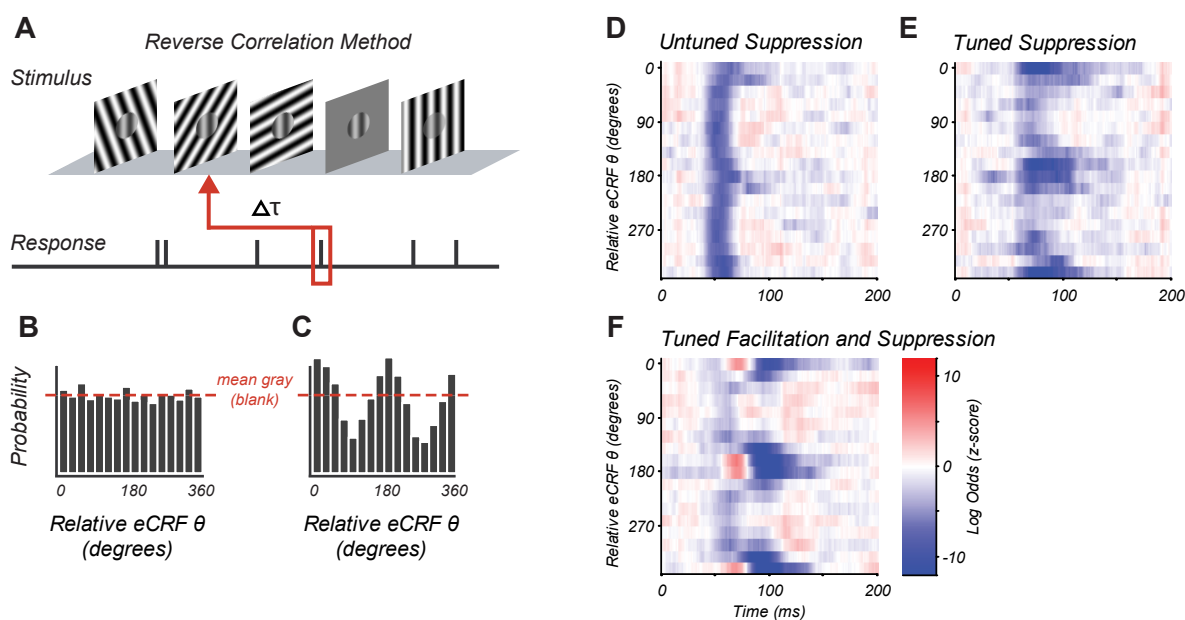

### Figure 1. Reverse Correlation Approach and Example eCRF Dynamics

(A) Orientations were briefly and randomly presented in the eCRF alongside optimal CRF stimulation. The probability of an eCRF stimulus prior to a spike was calculated for each delay ( $\tau$ ); blank eCRF stimuli were included as controls. (B) A hypothetical probability distribution for  $\tau = 0$  as a function of eCRF orientation (relative to CRF preference). The red dashed line shows the probability associated with the mean gray (blank) stimulus and no modulatory effect. (C) Same as in (B) but for a delay  $\tau$  where there is a strong facilitation at the preferred orientation (0, 180 deg) and suppression at the orthogonal orientation (90, 270 deg). (D-F) False color maps showing the log odds ratio (of the probability of each eCRF stimulus compared to blank) over time. Red indicates facilitation and blue suppression. (D) An example neuron showing strong suppression at all orientations (untuned) beginning at around 50 ms. (E) An example neuron showing strong suppressive modulation at its preferred orientation (tuned) around 75–100 ms. (F) An example neuron showing both early tuned collinear facilitation (red at ~60 ms) followed by delayed tuned suppression (blue at 90–140 ms).

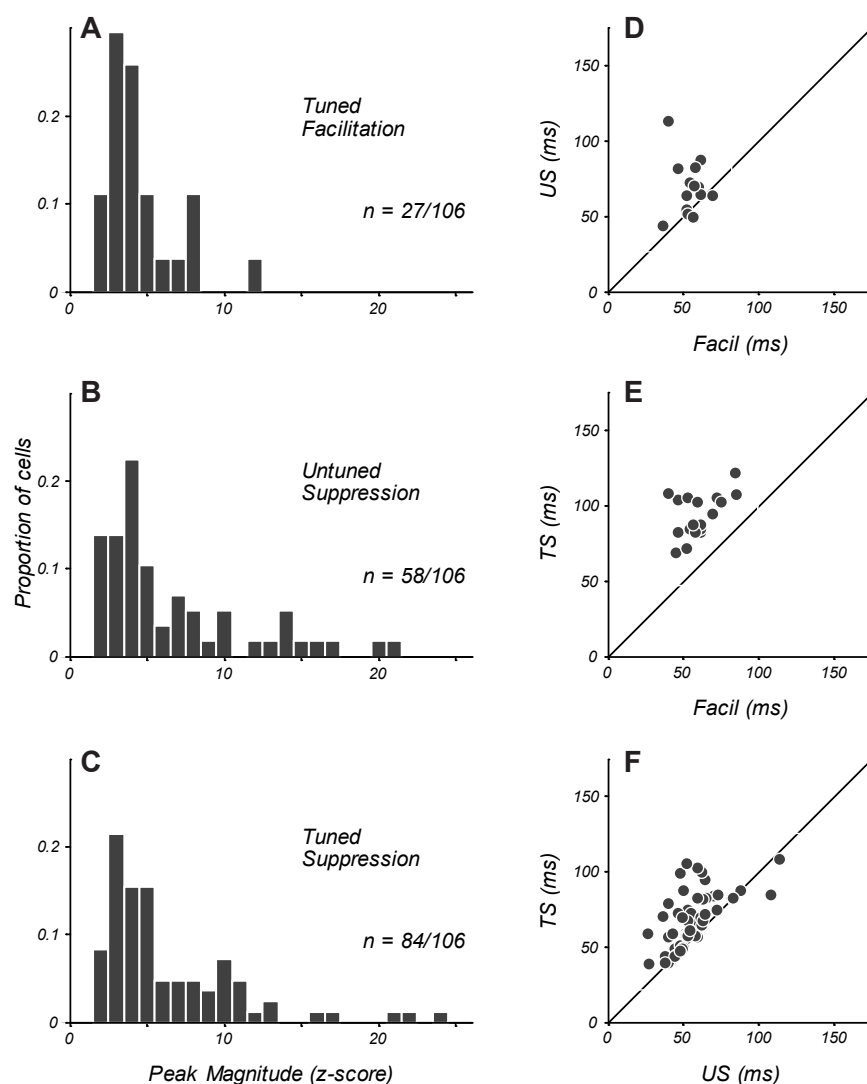

### Figure 2. Magnitude and Timing of eCRF Components

(A–C) The distribution of peak modulation strength in neurons with significant eCRF components of tuned facilitation (A), untuned suppression (B), and tuned suppression (C). Neurons with z-scored magnitudes  $> 2$  are included. (D) Comparison in individual neurons of the peak times of facilitation and untuned suppression (US). Diagonal indicates unity line. (E) Timing of facilitation and tuned suppression (TS). (F) Timing of untuned and tuned suppression.

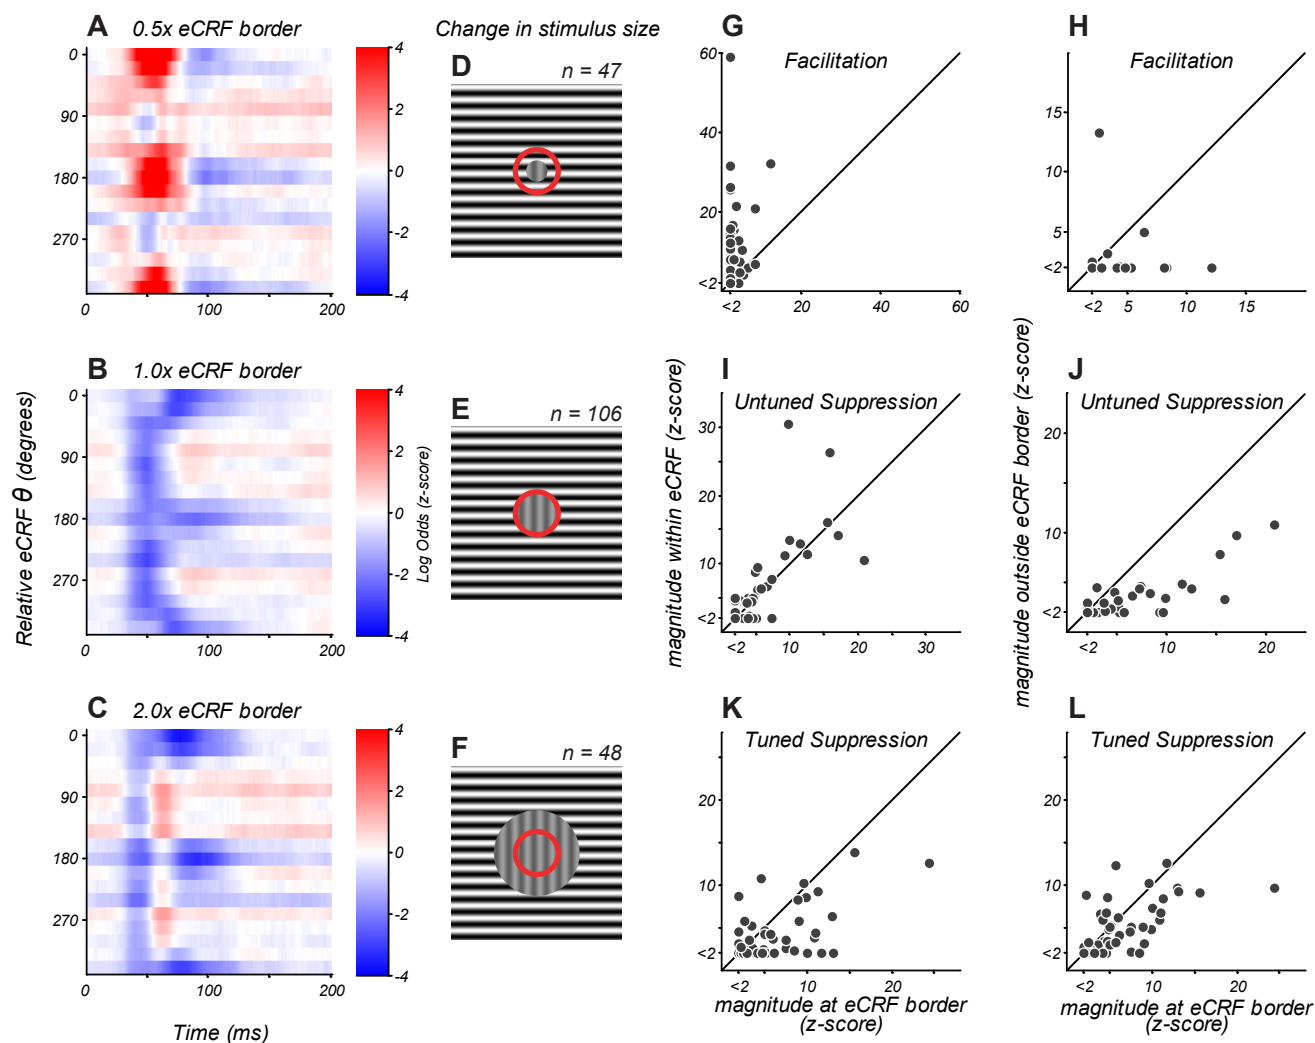

### Figure 3. eCRF Dynamics Change with Spatial Configuration

(A–C) eCRF modulation over time as a function of relative eCRF orientation for three spatial configurations, averaged over neurons. The location of the inner diameter of the surround stimulus is indicated at the top of each map. The color scales indicate modulation (red: facilitation; blue: suppression). (D–F) Spatial configurations associated with responses in A–C. The red circle denotes the border between the CRF and eCRF. Vertical grating indicates stimulus driving the CRF. Horizontal grating indicates where the dynamic eCRF stimulus was shown. (G–L) Change in the magnitude of modulation with spatial configuration, for eCRF components of facilitation (G–H), untuned suppression (I–J), and tuned suppression (K–L).

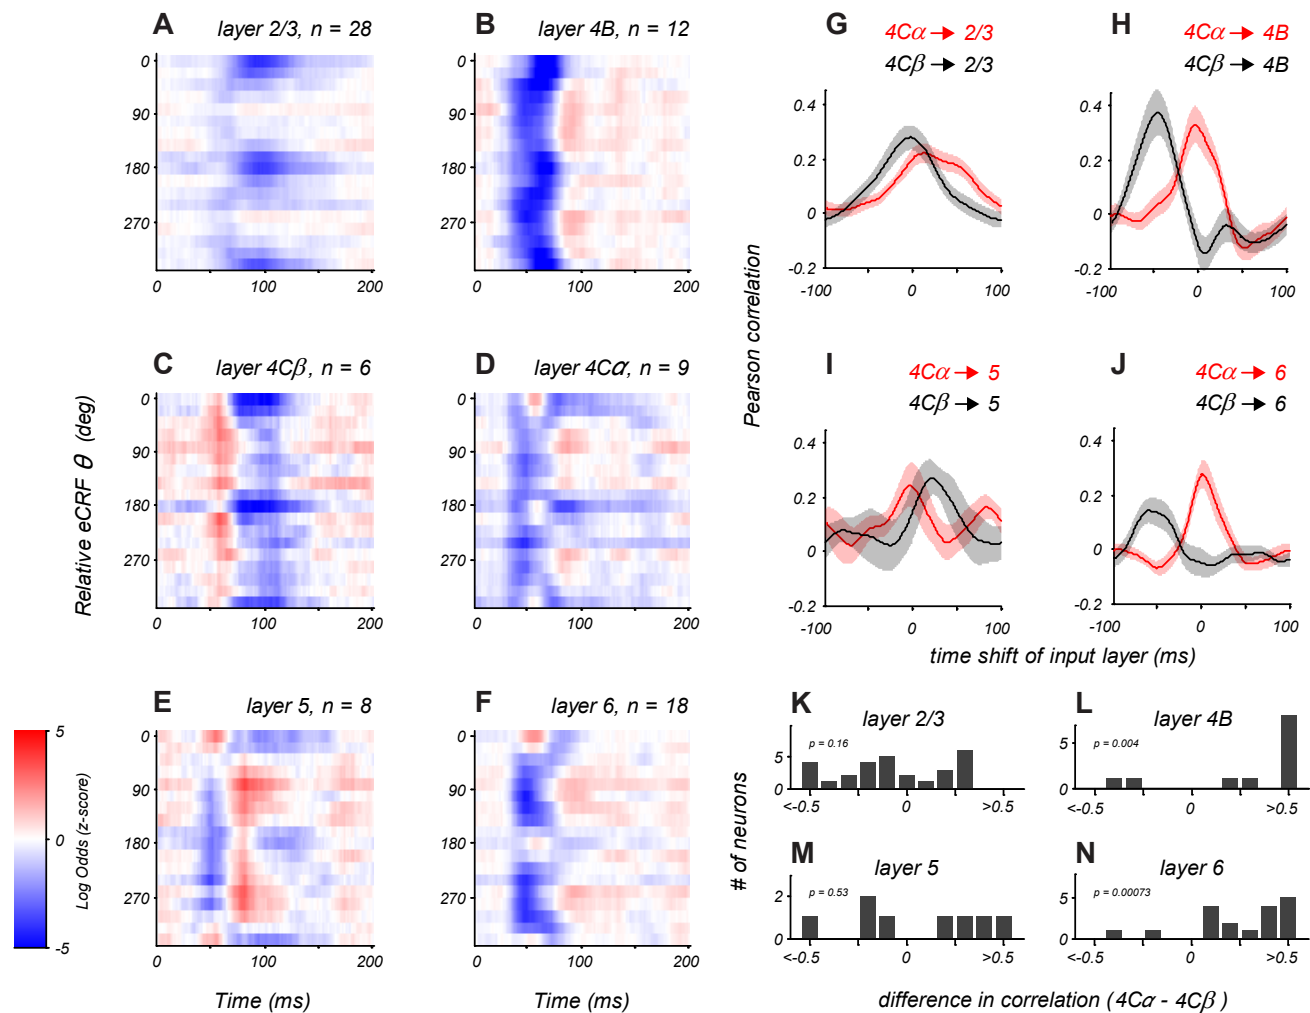

#### Figure 4. Distinct Laminar Patterns of eCRF Modulation

(A–F) Average eCRF dynamics by cortical layer for the CRF/eCRF border condition (1x CRF). Color scale represents the sign and strength of modulation (red: facilitation, blue: suppression). Sample size for each layer is listed above each plot. (G–J) Cross-correlation of eCRF kernels with the average kernels of the two divisions of input layer 4C (red: 4C $\alpha$  black: 4C $\beta$ ) at varying time lags (-100 to +100 ms). Each panel represents the average cross-correlation function for all neurons in a given layer (solid line: mean, shading: s.e.m.) for layers 2/3, 4B, 5, and 6. (K–N) Histograms show the difference in correlation values with 4C $\alpha$  and 4C $\beta$  at zero lag for all neurons in each cortical layer.

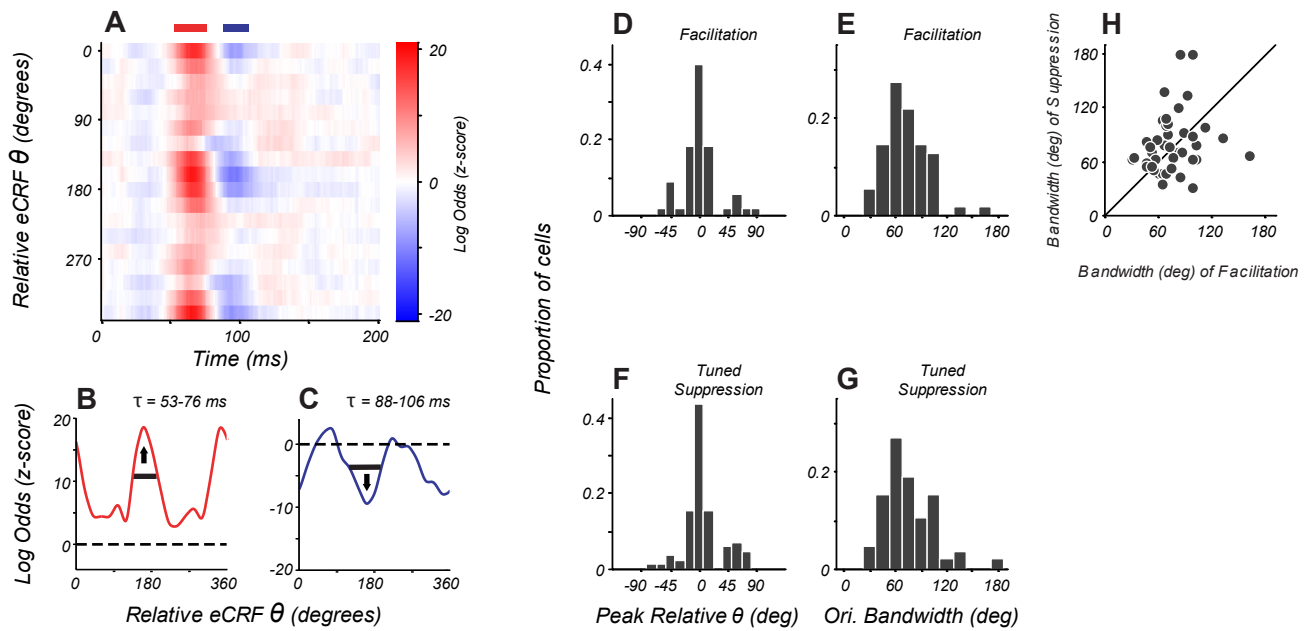

### Figure 5. Orientation Tuning of Suppression in eCRF Matches CRF Tuning

(A) eCRF dynamics from an example cell. Red and blue bars at top of figure show the windows used to determine the average tuning. (B–C) Average orientation tuning of eCRF components for the neuron in A. Black horizontal line indicates orientation bandwidth, arrow indicates peak orientation. (D, F) Population distribution of peak orientations for facilitation and tuned suppression. (E, G) Population distribution of orientation bandwidth (full width at half height) for facilitation and tuned suppression. (H) Relationship between orientation bandwidth for eCRF facilitation and eCRF suppression.



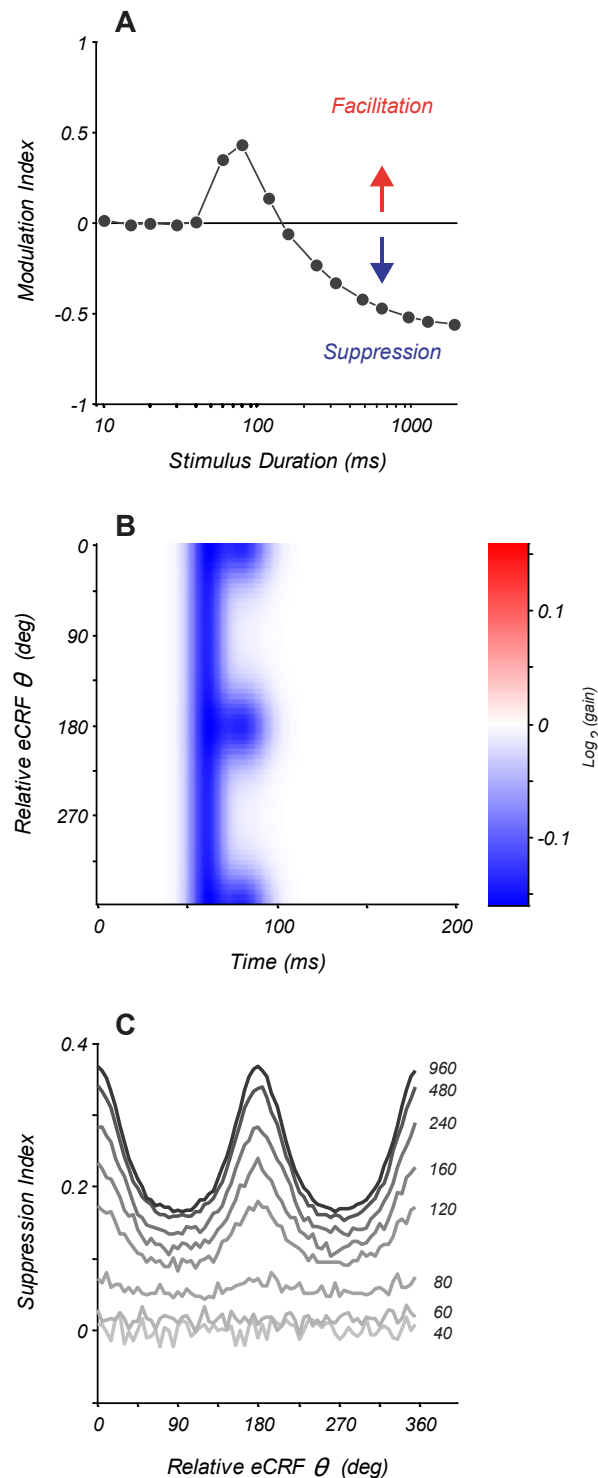

**Figure 6. Modeling eCRF Indicates Net Effects Change with Stimulus Duration.**

(A) Response modulation index as a function of stimulus duration for an eCRF model with short latency facilitation and long latency strong suppression. Modulation index is calculated as mean change in net spiking activity over the entire stimulus presentation. Positive values reflect facilitation, negative values suppression, horizontal line at zero reflects no net modulation. (B) eCRF dynamics of a model with both short latency untuned suppression and long latency tuned suppression. (C) The steady state suppression index as a function of relative eCRF orientation for the model shown in (B). Each trace shows a net suppression tuning curve for a stimulus of a fixed duration (duration shown to the right of each curve in ms).

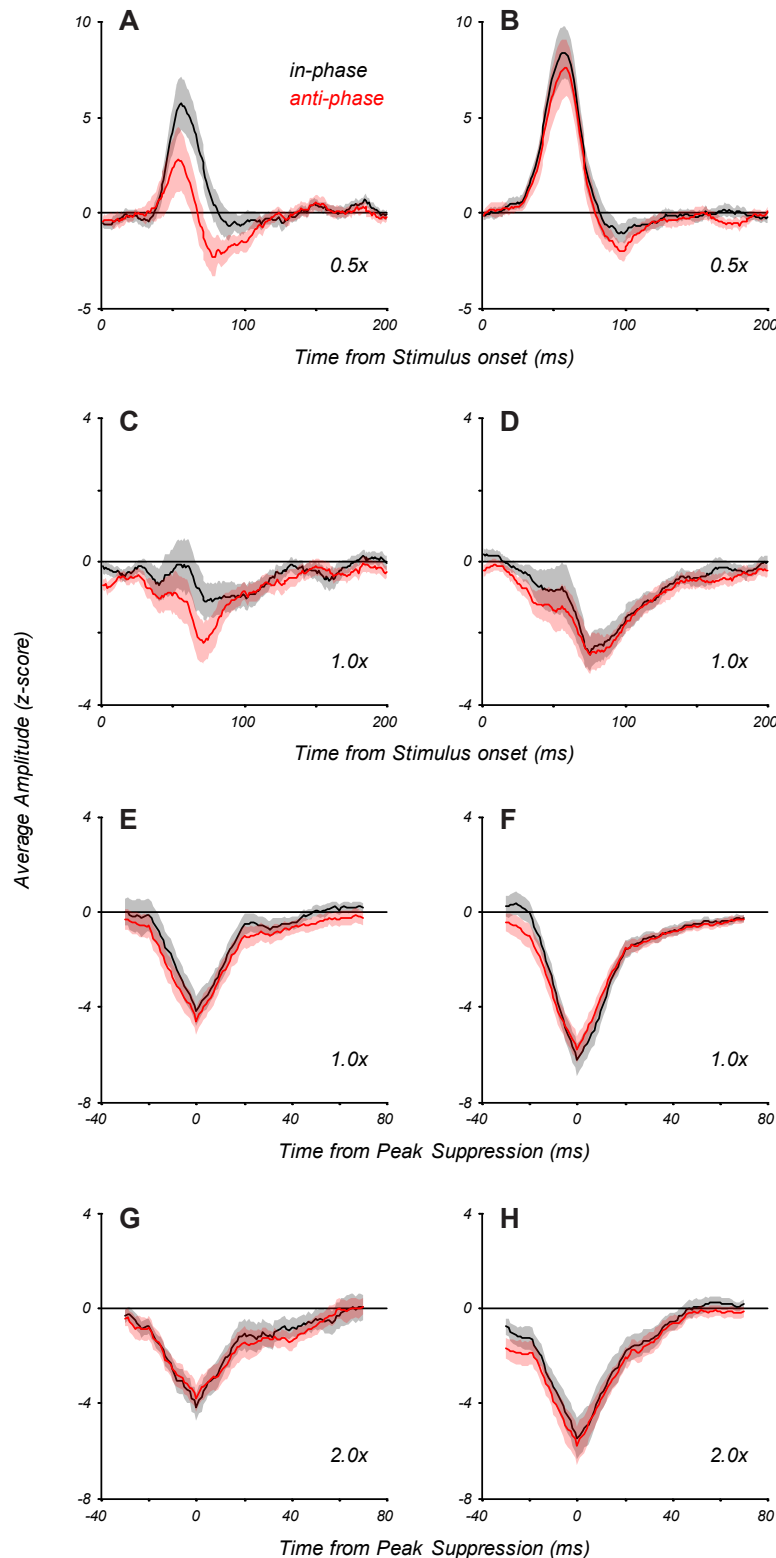

### Figure S1. Time Course of Facilitation and Suppression at Different Spatial Phases of the eCRF Stimulus

Response dynamics for eCRF stimuli matched in orientation to the CRF grating were split into those that were in-phase and anti-phase with the central grating, and averaged across neurons. (A) At the smallest spatial extent (0.5 x eCRF), which evokes early response facilitation, simple cells showed an increased response to in-phase eCRF stimuli: in-phase responses shown in black, anti-phase in red), presumably due to added integration within the CRF. (B) At the same scale, complex cells showed no such phase dependence. (C-D) At the large 1 x eCRF border scale, simple cells showed a slight phase dependence, while complex cells showed none. Suppression strength was only moderate, due in part to averaging over neurons with different peak times of suppression. (E-F) Traces at 1 x eCRF scale as in (C-D) but aligned to the time of peak suppression in individual neurons before averaging. It is clear that there is no phase-dependent suppression. (G-H) Traces at 2 x eCRF scale, aligned to the time of peak suppression. Suppression at greater extents also shows no phase-dependence.

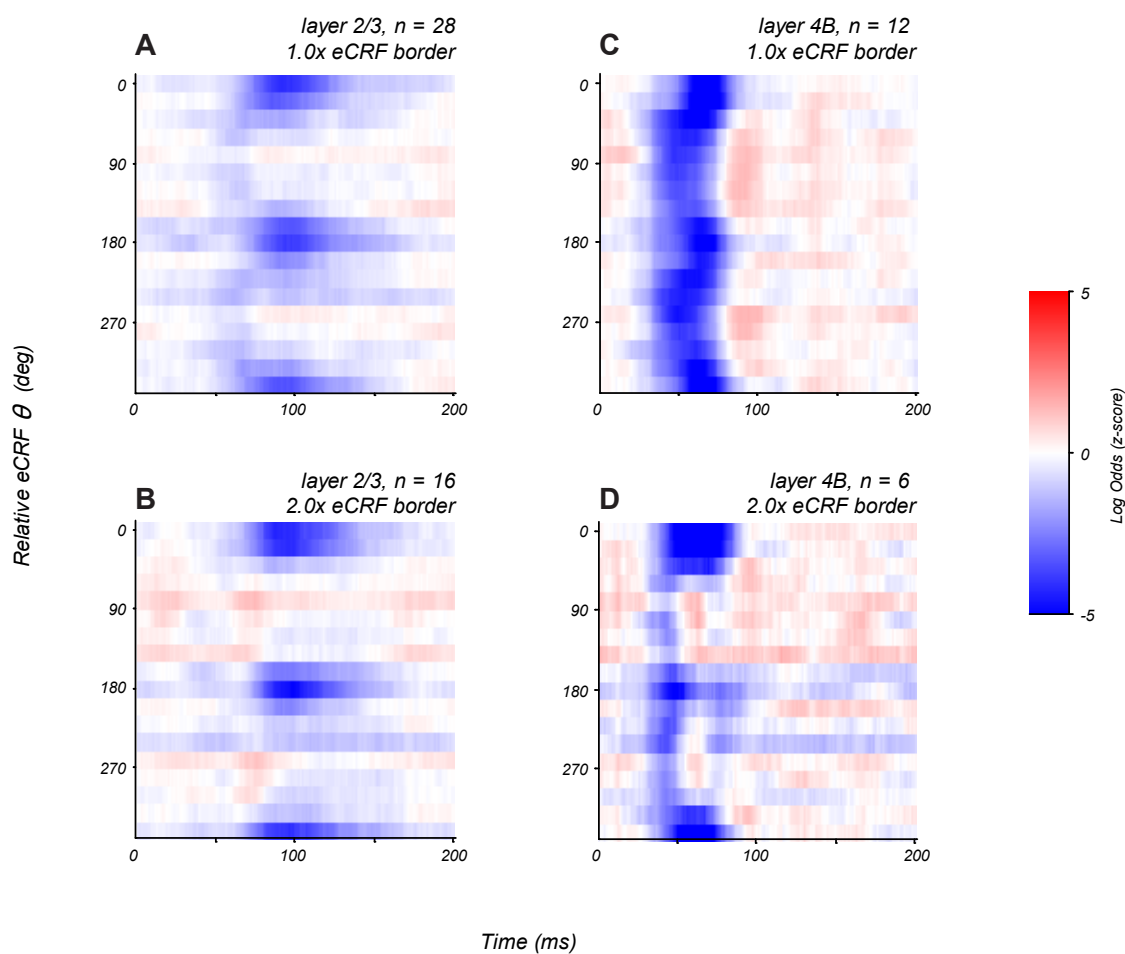

**Figure S2. Patterns of Modulation in Layers 2/3 and 4B at Different eCRF Extents**

(A, C) Averaged orientation vs time maps of modulation for the CRF/eCRF border condition (1x CRF) for neurons in layer 2/3 (A) and layer 4B (C). (B,D) Averaged orientation vs time maps of modulation for the 2x CRF border condition for neurons in layer 2/3 (B) and layer 4B (D). Tuned suppression is prevalent at larger spatial scales in both cortico-cortical output layers, though they exhibit distinct dynamics.
